# Supplementary material
Source: PubMed Central journal article supplement (PMC3522292)
Supplement: supp_M112.420414_Hagel_et_al_Supplemental_REVISED_FINAL_reduced.pdf [file supp_M112.420414_Hagel_et_al_Supplemental_REVISED_FINAL_reduced.pdf]

**Supplemental Table 1.** Sequences of PCR primers used to assemble expression and VIGS constructs, confirm TRV infection, and perform real-time quantitative (RT-q)PCR analysis.

***Pichia pastoris* expression constructs**

Primers used for sequence amplification and ligation into pPINK

| Sequence name    | Forward primer<br>5'-3' ( <i>Stu1</i> )  | Reverse primer<br>5'-3' ( <i>Kpn1</i> )                        | Insert size<br>(bp) |
|------------------|------------------------------------------|----------------------------------------------------------------|---------------------|
| pPINK-FADOX1     | GCGCAGGCCTATCGATACTGGCAAATTC             | GCGCGGTACCTCAAATAATCCATCACTT                                   | 1509                |
| pPINK-FADOX3     | GCGCAGGCCTTTTGGAACTTTATCAACAA            | GCGCGGTACCAGTGCATGCTTCAATAAGT                                  | 1551                |
| pPINK-FADOX5     | GCGCAGGCCTGCTAATAATTCACCTAATG            | GCGCGGTACCCTACTGCTTGCCCAAGTA                                   | 1536                |
| pPINK-FADOX7     | GCGCAGGCCTTCAAGTGAATATGAAGATGATTATAACTTT | GCGCGGTACCTTAATATGAAACCGCAGGAATACTCT                           | 1518                |
| pPINK-FADOX8     | GCAGGCCTATCTTCTCGAATGTGTTGGCAACAA        | GCGGTACCTTAAATCTTTAATACATAGGCAATACTTGGTAT                      | 1539                |
| pPINK-FADOX5-HIS | ATAGGCCTGCTAATAATTCACCTAATGGAGATTTTCTC   | ATGGTACCCTAATGATGATGATGATGATGCTGCTTGCCCC<br>AAGTACTAACA        | 1554                |
| pPINK-BBE1-HIS   | ATAGGCCTGGTGATGTTAATGATAATCTCCTCTC       | ATGGTACCCTAATGATGATGATGATGATGCAATTCCTTCAA<br>CATGTAATTTCTCAAAT | 1626                |
| pPINK-BBE2-HIS   | ATAGGCCTGGTGATGTTAATGATAATCTCCTCTC       | ATGGTACCCTAATGATGATGATGATGATGCAGTTCCTTCAA<br>CATGTAATTTCTCTC   | 1626                |

**VIGS constructs**

Primers used for sequence amplification and ligation into pTRV2

| Sequence name | Forward primer<br>5'-3' ( <i>BamHI</i> ) | Reverse primer<br>5'-3' ( <i>XhoI</i> ) | Insert size<br>(bp) |
|---------------|------------------------------------------|-----------------------------------------|---------------------|
| pTRV2-FADOX1  | GGATCCCCATACGTTTCTGAAGAAC                | CTCGAGGACGGAGCACTGACTGGGTAA             | 341                 |
| pTRV2-FADOX3  | GGATCCCCATTTGTTTCAAAATGT                 | CTCGAGACTGTAGAAAAATGTCAGA               | 392                 |
| pTRV2-BBE     | GGATCCGGTGTCCGACTGTTGGTAG                | CTCGAGTGGTATCTAATCCTGATAAGAAAGC         | 528                 |
| pTRV2-DBOX    | GGATCCCGTTATGTTTCCAAGAATC                | CTCGAGGAAAGACATAAACTCTTTC               | 410                 |
| pTRV2-FADOX8  | GGATCCCCCTGTTTCTTGGGGATGCTAA             | CTCGAGGTTTTTCGTTCCACGAAGATACATATAAAA    | 392                 |

**Confirmation of TRV infection**

Primers used for the detection of TRV in *A. tumefaciens*-infiltrated plants

| Sequence name    | Forward primer<br>(5'-3') | Reverse primer<br>(5'-3') | Product size<br>(bp) |
|------------------|---------------------------|---------------------------|----------------------|
| TRV-coat protein | ATGGGAGATATGTACGATG       | TAGGGATTAGGACGTATC        | 613                  |

## RT-qPCR analysis of VIGS plants

Primers used to quantify gene expression

| Gene name | Forward primer (5'-3')     | Reverse primer (5'-3')      | Product Size (bp) |
|-----------|----------------------------|-----------------------------|-------------------|
| FADOX1    | CATTCCAAGTGATGGATTATTTTGA  | GACGGAGCACTGACTGGGTAA       | 72                |
| FADOX3    | CATGCACTAGAGATGCTAATGTATCG | CATTGAGTTTTGACAGATTCACAGTAG | 73                |
| BBE       | CGGAAACAGCTTGGGTTGAA       | CTGCGCAATCGCATAGTAGAGT      | 62                |
| DBOX      | GGTTTGGTGCCTTGGTACGA       | GTGACAATGCGAGCATCAATG       | 67                |
| FADOX8    | CAATGCAGAGAGGAATGAGACTAGAA | CATCAGTTCATGACGGAATCAACT    | 78                |
| Ubiquitin | CCATTTGGTGCTTCGTCTAC       | CAAGCCATAGCTGAAACACC        | 276               |

## RT-qPCR analysis of plant organs

Primers used to quantify gene expression

| Gene name | Forward primer (5'-3')   | Reverse primer (5'-3')      | Product Size (bp) |
|-----------|--------------------------|-----------------------------|-------------------|
| BBE       | CGGAAACAGCTTGGGTTGA      | CGGACACCAACCAGCAGTAA        | 101               |
| DBOX      | GTAAGTGGGGCAAGCAGTAGAGAT | GCAGCTTATATGGACTGCACTGTATTA | 132               |
| Ubiquitin | CCATTTGGTGCTTCGTCTAC     | CAAGCCATAGCTGAAACACC        | 276               |

## *Saccharomyces cerevisiae* expression constructs

Primers used for sequence amplification and ligation into pYES2

| Primer Name    | Sequence (5'-3')                                              |
|----------------|---------------------------------------------------------------|
| pYES2 HA Tag F | TACCCATACGATGTTCCAGATTACGCTTAAATCATGTAATTAGTTATGTCACGCTTAC    |
| pYES2 HA Tag R | CTCCTTGACGTTAAAGTATAGAGG                                      |
| DBOX F         | ATATACCTCTATACTTTAACGTCAAGGAGAAAACAATGGCTAATAATTCACCTTAATGGAG |
| DBOX HA Tag R  | TTAAGCGTAATCTGGAACATCGTATGGGTAAGTCTGCTTGCCTTCCCAAGTACTAAC     |
| pYES F         | CCTGCATTAATGAATCGGC                                           |
| pYES R         | ACTAGTGGATCATCCCCAC                                           |
| 6OMT F         | GAAGATAAGAAAGATTTAATTATCAAAAAACAATGGAAACAGTATCAAAGATCGAC      |
| 6OMT R         | GAATGTAAGCGTGACATAACTAATTACATGATTAATATGGATAGGCTTCGATCAGC      |
| 4OMT F         | AGTTTTAAAACCAAGAAGTCTTTCGAAAAACAATGGGTTCTTGGATGCG             |
| 4OMT R         | GACCAAACTCTGGCGAAGAAGTCCATTATGGAAAAGCTTCTATAACAGATTGTATTG     |
| PMA1 F         | GAGACTGCAGCATTACTTTGAGAAGACAGGCATTGCTGGGATCAC                 |
| PMA1 R         | AGTAGATACACACTGACTCTGGACTTTGATAATTAATCTTCTTATCTTATTCTTTTC     |
| TDH3 F         | GAGACTGCAGCATTACTTTGAGAAGTCTGAGTTTATCATTATCAATAC              |
| TDH3 R         | AGTAGATACACACTGACTCTGGACTCGAAACTAAGTTCTTGGTG                  |
| CYC1 F         | TCACTTACACGAGGAGATGCATTGTCATGTAATTAGTTATGTCACGCTTACATTC       |
| CYC1 R         | ACAACATCATGGTGTGATTGCCGCAAATTAAGCCTTCGAGCGTC                  |

|           |                                                                             |
|-----------|-----------------------------------------------------------------------------|
| ADH1 F    | TCACTTACACGAGGAGATGCATTGTGGACTTCTTCGCCAGAGGTTTG                             |
| ADH1 R    | ACAACTCATGGTGATGTGATTGCCGCATGCCGGTAGAGGTGTGG                                |
| pYES:C1 F | CCGCCGCGCTTAATGGGGCGCTACAGGGCGCGTGGGGATGATCCACTAGTGAGACTGCAGCATTACTTTGAGAAG |
| PMA1 R2   | TTGATACTGTTTCCATTGTTTTTTGATAATTAATCTTTCTTATCTTATTCTTTTC                     |
| CYC1 F2   | CGTGATCGAAGCCTATCCATATTAATCATGTAATTAGTTATGTCACGCTTACATTC                    |
| C6:H1 R   | CAATCTCGCCACAGCCCCTTTCTTTAATCATTCCGACCCCGCCATGAGACAACTCATGGTGATGTGATTGCC    |
| C1:H1 F   | CTCATGGCGGGGTCGGAATGATTAAGAAAGGGGCTGTGGGCGAGATTGGAGACTGCAGCATTACTTTGAGAAG   |
| TDH3 R2   | GGCTTCGCATCCAAGGAACCCATTGTTTTTCGAAACTAAGTTCTTGGTGTTTTAAACT                  |
| ADH1 F2   | GAGCAATACAATCTGTTATAGAAGCTTTCCATAATGGACTTCTTCGCCAGAGGTTTG                   |
| pYES:C6 R | CAATACGCAAACCGCCTCTCCCCGCGCGTTGGCCGATTCATTAATGCAGGACAACTCATGGTGATGTGATTGCC  |

**Supplemental Table 2.** Compound list and CID spectra used for the identification and quantification of benzyloisoquinoline alkaloids by LC-MS/MS in plants subjected to virus-induced gene silencing.

| Compound                   | [M+H] <sup>+</sup> | Retention time (min) | CE (eV) | ESI <sup>+</sup> -CID, m/z<br>(Relative abundance)                                                                                                            | Reference                                                            |
|----------------------------|--------------------|----------------------|---------|---------------------------------------------------------------------------------------------------------------------------------------------------------------|----------------------------------------------------------------------|
| <i>N</i> -Methylcoclaurine | 300                | 6.27                 | 30      | 300 (18), 269 (26), 237 (16), 219 (3), 209 (15), 192 (10), 175 (13), 161 (8), 145 (14), 143 (31), 121 (40), 107 (100)                                         | Schmidt et al. 2007 <sup>a</sup>                                     |
| Thebaine                   | 312                | 6.49                 | 30      | 312 (2), 281 (2), 266(4), 255 (1), 251 (11), 249 (2), 237 (1), 234 (2), 223 (2), 221 (7), 218 (4), 195 (2), 177 (1), 58 (100)                                 | Authentic standard                                                   |
| Coptisine                  | 320                | 12.63                | 30      | 320 (100), 318 (7), 292 (30), 290 (6), 277 (6), 262 (4), 249 (2), 234 (2)                                                                                     | Wang et al., 2004 <sup>b</sup>                                       |
| Stylophine                 | 324                | 11.54                | 30      | 324 (24), 265 (1), 176 (100), 174 (3), 149 (26), 119 (2), 91 (2)                                                                                              | Authentic standard                                                   |
| Dehydroscoulerine          | 326                | 10.13                | 35      | 326 (14), 311 (59), 310 (100), 296 (8), 295 (7), 294 (17), 282 (52), 268 (14), 267 (20)                                                                       | Inferred                                                             |
| Scoulerine                 | 328                | 7.22                 | 30      | 328 (25), 178 (100), 151 (5)                                                                                                                                  | Authentic standard                                                   |
| Reticuline                 | 330                | 5.25                 | 30      | 330 (1), 299 (1), 298 (36), 267 (3), 239 (3), 227 (1), 207 (2), 192 (100), 175 (21), 151 (4), 145 (1), 143 (21), 137 (33)                                     | Authentic standard                                                   |
| Sanguinarine               | 332                | 7.71                 | 35      | 332 (76), 330 (24), 317 (72), 304 (58), 302 (26), 289 (13), 276 (16), 275 (17), 274 (100), 261 (7), 248 (12), 246 (49), 244 (21), 218 (25), 216 (15), 189 (4) | Authentic standard                                                   |
| Dihydrosanguinarine        | 334                | 12.81                | 35      | 334 (7), 319 (88), 318 (100), 276 (11)                                                                                                                        | Authentic standard                                                   |
| Berberine                  | 336                | 6.40                 | 35      | 336 (67), 321 (77), 320 (100), 306 (21), 304 (17), 292 (82), 278 (4), 275 (5)                                                                                 | Authentic Standard                                                   |
| Columbamine                | 338                | 9.53                 | 35      | 338 (90), 323 (100), 322 (8), 308 (3), 294 (6), 279 (1)                                                                                                       | Zhang et al., 2006 <sup>c</sup> ; Liscombe et al., 2009 <sup>d</sup> |
| Papaverine                 | 340                | 8.12                 | 35      | 340 (89), 324 (65), 296 (10), 202 (100), 171 (13)                                                                                                             | Authentic standard                                                   |
| Canadine                   | 340                | 10.89                | 25      | 340 (13), 176 (100), 165 (3), 149 (9)                                                                                                                         | Authentic standard                                                   |



|                       |     |       |    |                                                                                                                 |                                                                  |
|-----------------------|-----|-------|----|-----------------------------------------------------------------------------------------------------------------|------------------------------------------------------------------|
| Tetrahydrocolumbamine | 342 | 8.50  | 20 | 342 (36), 192 (5), 178 (100), 165 (4), 151 (13)                                                                 | Authentic standard                                               |
| Tetrahydropapaverine  | 344 | 7.83  | 20 | 344 (2), 327 (11), 312 (2), 296 (6), 281 (5), 192 (100), 189 (36), 174 (6), 165 (3), 158 (2), 151 (27), 136 (5) | Authentic standard                                               |
| Chelerythrine         | 348 | 7.82  | 25 | 348 (54), 333 (44), 332 (100), 318 (30), 316 (9), 315 (9), 304 (56), 303 (3), 290(12), 287 (5)                  | Authentic standard                                               |
| Dihydrochelerythrine  | 350 | 12.72 | 25 | 350 (58), 335 (25), 334 (100), 320 (38), 306 (53), 292 (8)                                                      | Authentic standard                                               |
| Palmatine             | 352 | 10.74 | 25 | 352 (50), 337 (53), 336 (100), 322 (28), 320 (17), 308 (69), 294 (7)                                            | Wang et al., 2004 <sup>b</sup> ; Zhang et al., 2006 <sup>c</sup> |
| Protopine             | 354 | 6.71  | 30 | 354 (100), 336 (8), 275 (19), 247 (9), 206 (22), 189 (70), 188 (65), 165 (11), 149 (31)                         | Authentic standard                                               |
| Tetrahydropalmatine   | 356 | 9.98  | 20 | 356 (48), 192 (100), 165 (27), 150 (3)                                                                          | Authentic standard                                               |
| Noscapine             | 414 | 10.84 | 25 | 414 (4), 365 (5), 353 (21), 323 (5), 220 (100), 206 (4), 179 (8)                                                | Authentic standard                                               |

<sup>a</sup> Schmidt, J., Boettcher, C., Kuhnt, C., Kutchan, T.M., and Zenk, M.H. (2007) *Phytochemistry* **68**, 189-202

<sup>b</sup> Wang, D., Liu, Z., Guo, M., and Liu S. (2004) *J. Mass Spec.* **39**, 1356-1365

<sup>c</sup> Zhang, Y., Shi, Q., Shi, P., Zhang, W., and Cheng, Y. (2006) *Rap. Comm. Mass Spectrom.* **20**, 2328-2342

<sup>d</sup> Liscombe DK, Ziegler J, Schmidt J, Ammer C, and Facchini PJ (2009) *Plant J.* **60**, 729-743

```

      . . . .10 . . . .20 . . . .30 . . . .40 . . . .50 . . . .60
BBE      . . . . .MMCRSLTLRFFLFIVLLQTCVRGGDVN.DNLLSSCLNSHGVDN.FTTLSTDT 50
FADOX1   . . . . .MERYSIILLISVLFFSFLGTTSIDT...GKFLKCLKLSKGTG.FIPIYTPN 47
FADOX3   . . . . .MGIFSNSYLLVVSFLFVSFGLTSTSDIHENFLQCLSLNSHT..YTPTYTKS 52
FADOX4   . . . . .MMCRSLTLRFFLFFVLLQTCVRGGDVN.DNLLSSCLNSHGVDN.FTTLSTDT 50
FADOX5   . . . . .MMMSSSNILPLVTFVLVLFSSGWAANNSLNGDFLQCIKKNEYSSIPIPIFTPD 55
FADOX7   MNMIRSTTQSSSSLLLYAFLLLSISLVTSSSEYEDDYNFLQCLSQHSDP..SILTYTSK 58
FADOX8   . . . . .MRTASSNLLLLVVISLSFSIFSNVLATT.HGEFLTICISLHSST..SIPIYTPQ 51
FADOX9   . . . . .
FADOX10  . . . . .
FADOX11  . . . . .
FADOX12  . . . . .
FADOX13  . . . . .
FADOX14  . . . . .
FADOX15  . . . . .
FADOX16  . . . . .EPLHQNLILLVVISLSFSIFSNVLATT.HGEFLTICISLHSST..SIPIYTPQ 50

```

```

      . . . .70 . . . .80 . . . .90 . . . .100 . . . .110 . . . .120
BBE      NSDYFKLLHASMQNPLFAKPTVS.KPSFIVMPGSKEELSSTVHCCCTRESWTIRLRSGGHS 109
FADOX1   SSRFSSIWTSTVHNIRFITSTTL.KPEFILLPSDESHVQASVICSKQHILMKIRSGGHD 106
FADOX3   NPNYTSILESNIYQRPSSSTNLKPFLLITPLQESQVQASVICSKKHGVQLKVRSGGHD 112
FADOX4   NSDYFKLLHASIQNPLFAKPTVS.KPSFIVMPGSKEELSRTVHCCCTRESWTIRLRSGGHS 109
FADOX5   NSSFTTIFRSSARNLRFLLTPNSTQTPQFLLITPETHESHVQASVCSQKHGFDLKVRSGGHD 115
FADOX7   DSNFSSVLFSTIQSLRFYSPAIR.KPRVIVTPLKESHVQASVICSKRHGFQIRVRSGGHD 117
FADOX8   SVNYSSILQSTISLLRFNSSTTP.KPFLILTPLEESHVQAVICSRKHGIQIKVRSGGHD 110
FADOX9   . . . . .
FADOX10  . . . . .
FADOX11  . . . . .
FADOX12  . . . . .
FADOX13  . . . . .
FADOX14  . . . . .
FADOX15  . . . . .
FADOX16  SVNYSSILQSTISLLRFNSSTTP.KPFLILTPLEESHVQAVICSRKHGIQIKVRSGGHD 109

```

```

      . . . .130 . . . .140 . . . .150 . . . .160 . . . .170 . . . .180
BBE      YEGLSYTADTPFVIIVDMNLRNRSIDVLSETAWVESGATLGELYAIAQSTDTLG.FTAG 168
FADOX1   YEGLSSISDVSFLIIDLNLRSINVDENKTAWVQSGALMGELYRIAEEKSKTLG.FPAG 165
FADOX3   YEGLSYVSDVPFVIIVDMINLRAINVNAKDGTAWVQSGATLGELYRIAIEKNRTLK.FPAA 171
FADOX4   YEGLSYTADTPFVIIVDMNLRNRSIDVSESETAWVESGATLGELYAIAQSTETLG.FTAG 168
FADOX5   YEGLSYVSDTPYVLVDLINFNRNIIVDLKEKTAWIQAGASLGEVYVQAANKSNNTLGFAG 175
FADOX7   YEGLSYVSDVPFVVVDLNLRSIKIDVENSTAWVESGALTGELYRIAIEKSRNLG.FPSV 176
FADOX8   YEGLSYTSDVPFIIIDLNLRDINVDTKGKSAAVQSGATTGELYYNIAKKSNTLA.FPAA 169
FADOX9   . . . . .PFIIIVDLFKLRAINVNVKNRVAVVQSGATVGELEYRIAIEKSPSLG.FPAA 49
FADOX10  . . . . .
FADOX11  . . . . .
FADOX12  . . . . .
FADOX13  . . . . .
FADOX14  . . . . .
FADOX15  . . . . .
FADOX16  YEGLSYTSDVPFIIIDLNLRDINVDTKGKSAAVQSGATTGELYYNIAKKSNTLA.FPAA 168

```

. . . 190 . . . 200 . . . 210 . . . 220 . . . 230 . . . 240  
BBE WCPTVGS~~GGHI~~~~SGGG~~~~FGMMSRKYGLA~~~~ADNVDA~~~~ILLID~~~~SNGAT~~~~LDREKMG~~~~DDVFWAIRGGG~~ 228  
FADOX1 VCPTVGVGGLFSGGGYGTLLRKYGLAADNVDAQIVDVNCKILLDRESMGE~~DLFWAIRGGA~~ 225  
FADOX3 VCTTVGVGGQFSGGGYGSLLRKYGVAGDNVIDVRIVDAHGOILNKDTMGEDLFWAIRGGG 231  
FADOX4 WCPTVGS~~GGHI~~~~SGGG~~~~FGMMSRKYGLA~~~~ADNVDA~~~~ILLID~~~~STGSIL~~~~DREKMG~~~~EDVFWAIRGGG~~ 228  
FADOX5 FCPTVGVAGHISGGGFGALVRKYGLASDQVIDARIVTVDGKIYTKETMGKDLYWAIRGGG 235  
FADOX7 FCPTVGVGGSFQGGGYGNMLRKYGLAADNVDAQGRVLDKESMGE~~DLFWAIRGGG~~ 236  
FADOX8 ICTTVGIGGHI~~SGGGYGSMLRKYGT~~~~AGDNVIDARIVDVHGRILNRKSMGE~~~~GLFWAIRGGG~~ 229  
FADOX9 FCATVGVGGFLS~~GGGYGSMFRKYGLA~~~~ADNVINARI~~~~VDVHGKILDKRSMGK~~~~DLFWAIRGGG~~ 109  
FADOX10 . . . . . KIQIHCNQNLLQIKSSICNTRNTV 27  
FADOX11 . . . . .  
FADOX12 . . . . .  
FADOX13 . . . . .  
FADOX14 . . . . .  
FADOX15 . . . . . QFSGGGYGSMLRKYGLADNVIDIRVVDARCKILNKETMGKDLFWAIRGGG 51  
FADOX16 ICTTVGIGGHI~~SGGGYGS~~~~SDVKEIWN~~ . . . . . 193

. . . 250 . . . 260 . . . 270 . . . 280 . . . 290 . . . 300  
BBE GGVWGAIIYAWKIKLLPVPEKLT~~VFRVTKNVG~~~~IED~~.ASSLLHKWQYVADELDE~~DFTVSVLG~~ 287  
FADOX1 PGSGFVILSWKIRLVYVPPVTVVFRIEKLRDDADLISLVYRWOEVAHKLPRELFI~~RAGI~~ 285  
FADOX3 GGSFGVLSWKIKLVPVPTVTMTITIKLLEE..GATGLVHKWQEVAPKFPNELFMRVIL 289  
FADOX4 GGVWGAIIYAWKIKLLPVPEKLT~~VFRVTKNVG~~~~IED~~.ASSLLHKWQYVADELDE~~DFTVSVLG~~ 287  
FADOX5 ANNFGVLLSWKVKLVPVTVVTVATISRTLEQG..ATDLVHKWQFVADRLHEDVYIGLTF 293  
FADOX7 .MSFGIVVSWKIRLVYVPTVTVF~~TINKNL~~~~DQ~~..GATKLVHRWQEVASELPH~~ELFVRVSI~~ 293  
FADOX8 GGSFGIVLSWKLRVSVPPVTVVFSV~~GKTLAEGATSLVHKWQDIAHKLPQELLIFLTLRV~~ 289  
FADOX9 GGSFGIVLSWKIRLVDPPTVALCSV~~KRSOED~~..GATKIVHKWQEV~~AHKLPQEVFLD~~~~VDL~~ 167  
FADOX10 DVAKEIVLSWKIRLVSVPPVTVVFSV~~GKTLAER~~..ATSLVRKWKQVAHKLP~~HDLFIM~~~~LG~~V 85  
FADOX11 . . . . . SFMEDQIVTVPPVTVVFSV~~GKTLAEG~~..ATSLVHKWQV~~AHKLPHDLFLQ~~~~LGL~~ 51  
FADOX12 . . . . .  
FADOX13 . . . . .  
FADOX14 . . . . . VTVFSPGRVLEQD..ATKLV~~MKWQVADKLPQDLFIRL~~.. 36  
FADOX15 GGSFGVLSWKIKLVPVPTVTIT~~ITIKLLEE~~..GATGLVHKWQEVAPKFPNELFMR... 106  
FADOX16 . . . . .

. . . 310 . . . 320 . . . 330 . . . 340 . . . 350 . . . 360  
BBE GVNG.....NDAWLMFLGLHLGRKDAAKTI~~IDEKFP~~~~ELGLVDKEFQ~~~~EMSWGESMAFLS~~ 340  
FADOX1 APVG...TNERRTIKAS~~FISLSLGD~~~~TKTLVPVMKEGF~~~~PELGL~~~~ESKDCI~~~~EMSWIRSVLWYA~~ 342  
FADOX3 TLGTSTTQKGGKTIQAS~~FNSMYLGT~~~~TTKLLVMKERF~~~~PELGL~~~~TSKDC~~~~TETSWVRSTLYFG~~ 349  
FADOX4 GVNG.....NDAWLMFLGLYLGREDAAKTI~~IDEKFP~~~~ELGSVEEEFQ~~~~EMSWVASTAFLS~~ 340  
FADOX5 SVANS.SRAGGKTVSVQFAFLFLGSDRLELMEBS~~FPELGLKRN~~~~NETTEMK~~~~WVESHVYF~~ 352  
FADOX7 SVVNSTKEGQK~~ILASFP~~~~SLYLGN~~~~TENLLAVMKERF~~~~PELGL~~~~ETKDC~~~~AE~~~~MTW~~~~IQS~~~~QLYIN~~ 353  
FADOX8 VNAT...TKDEKTVRAT~~FRSLFLG~~~~DAKLIKIVMK~~~~QTFPELGL~~~~ESKDS~~~~IEMSWI~~~~QSVLFLD~~ 346  
FADOX9 TAVN..ATGNNKTFLAS~~FNSVYL~~~~GGVEKFQ~~~~IVMKERF~~~~PELGL~~~~ETKDC~~~~IEMSWI~~~~QSVLFSS~~ 225  
FADOX10 GVVDS.TPTGNKTIL~~TFTSLFLG~~~~DSKKLQ~~~~IVMKERF~~~~PELGL~~~~EAKDC~~~~IEMSWL~~~~RSVLF~~~~FLD~~ 144  
FADOX11 SVVDA.TPKEEKTIL~~ATFDSMYL~~~~GDAKLIK~~~~QTIM~~~~QDKFPELGL~~~~ESKDY~~~~IEMSWI~~~~QSVLLFD~~ 110  
FADOX12 . . . . .  
FADOX13 . . . . .  
FADOX14 VVQLG.TWNGKKT~~VQVFN~~~~SLYLGAQDIL~~~~LKIQ~~~~QSFPELGL~~~~TTNDCK~~~~EMSWID~~~~SVVNIG~~ 95  
FADOX15 . . . . .  
FADOX16 . . . . .

```

. . . 370 . . . 380 . . . 390 . . . 400 . . . 410 . . . 420
BBE      GLDTISELNNRFLKFDER...AFKTKVDFTKVSVPLNVFRHALEMLSEQP..GGFIALNG 395
FADOX1  GMPYNGTLDVLLNRTQSKR..FAKGKSDYVKTPIPVAALEGAWKILKEGV..RPVMTMNP 398
FADOX3  NFPVDGPLNNLLSRSKAAN..TFKAKSDYVRRPISKIGLEGLWRRLTKE..NPVIIFTP 405
FADOX4  GLETVSELNNRFLKFDER...AFKTKVDFTKEPVPLNVFRRALEMLSEQP..GGFIALNG 395
FADOX5  .ARGRPIELLWRDRDHATKS..FLKIKADYVREPISKSGLEAIWRRFVGGD..SPAMLWTP 407
FADOX7  GFPVNGSLDILLSRNOVKR..YAKIKSDYVKEPIPETGLEGLWKKILEEKS.VARMNFSP 410
FADOX8  NIPTNSSIDILGSRPOAKA..YYKGKSDYVKEPISQTGLELIWERLINDG..QTAMAFMP 402
FADOX9  GYPLNVTLEVLNQTQPKT..FFKIKSDYVKEPISEIGLEGLWERLLIEE..LTFLTFIP 281
FADOX10 GLPTNGSIDILVNRPOQOS..YFKVKSDYVKQIPISQIGLGKIWERLTKDE..QNGMMFMP 200
FADOX11 GIPTNSSIDILVNRPOAKS..MGKGKSDYVKQVIAQVELETTIWERMLKDE..QNGMVLIP 166
FADOX12 .....PLESLVRDNPTANYFFKSKSDYVKTPVSKTALAGLWRMLLKQENVMPLIWT 54
FADOX13 .....
FADOX14 ..TINKFLNC..... 103
FADOX15 .....
FADOX16 .....

```

```

. . . 430 . . . 440 . . . 450 . . . 460 . . . 470 . . . 480
BBE      FGGKMSEISTDFTPPHRKGTKLMFEYIIAWNQDEE.SKIGEFSEWLAKFYDYLEPFVSK 454
FADOX1  YGGIMDEIAETSIPPHRSGTILQIQYLTIWTEPGP.EETERRIDWMRKFYEYMAPYVSK 457
FADOX3  YGGRMNEISESAPPHRNGTLYMIMYVVIWNKEEGVETSKKYLTWNRNLYRYMAPFVSK 465
FADOX4  FGGKMSEISTDFTPPHRKGTKLMFEYIIAWNQDEE.TKIEEFSEWLTKFYDYLEPFVSK 454
FADOX5  FGGRMNEISESEFTPPHRAGNIYNIMYVGNWMNET..ESEKQIDWMRRFYNSMARIYVSK 464
FADOX7  NGGRMAEISECETPPHRQCNLYSIQYVVGWEGAGS.EAAEPHIRWMRELHEYMTPYVSI 469
FADOX8  YGGRMSQISESETPPHRNGNLFKILYVSSWNEKQV.STSDKYINQLRKMYRFMTPYVSK 461
FADOX9  YGGRMSEISESAPPHRNGNLFKIIYLVSWDEKQD.HASKKYISGVRNLYKYMTPYVSK 340
FADOX10 YGGRMSQIAESETPPHRNGTLFKIIYLVYWDAKQD.ATSOKYINQIRRMYEFMTPYVSK 259
FADOX11 YGCKMSEIAESETPPHRDGTLFMIFHFVFWDEKQ...VPEKYIDQIRRMYEFMTPYVSK 223
FADOX12 .....
FADOX13 .....
FADOX14 .....
FADOX15 .....
FADOX16 .....

```

```

. . . 490 . . . 500 . . . 510 . . . 520 . . . 530 . . . 540
BBE      EPRVGYVNHIDLDLIGIDWRNKSSTTNAVEIARNWGERYFSSNYERLVKAKTLIDPNNVF 514
FADOX1  NPREAYVNYRDLDLG.V...SRNGSANYLQGTAWGSKYFKNNYKRLVQVKSIVDPENFF 512
FADOX3  CPREAYVNYRDLDLGQ....SKNGTASYLSGRTWGRKYFKGNYKRLVQVKSKFDPENFF 520
FADOX4  GPRVGYVNHIDLEIGIDWRNKSSTSNAVEIARNWGERYFSSNYERLVKAKTLIDPNNVF 514
FADOX5  NPRSAYINYKDLDLGVNRN..NVSEAVGYVQARSWGRKYFKSNFERLVKVKSMVDPGNFF 522
FADOX7  SPREAYLNYRDLDLVQ....SINGTATYLEGMVWGSKYFKNNYERLVQVKSKVDPENFF 524
FADOX8  SPREAYVNYRDLDLIGET...SKNGTASYSQAKVWGTKYFKGNFDRLVAVKSKIDPDNFF 517
FADOX9  SPREAYLNYRDLDLGQ...SKNGKASYSQASTWGRKYFKNNYKRLVRVKSKVDPDNFF 396
FADOX10 SPREAYVNYRDLDLGQT...SKNGTASYSQAKVWGTKYFKDNFDRLVVVKTKVDPDNFF 315
FADOX11 SPRGAYANYRDLNLGQT...NINGTSSYSQAKVWGSKYFKDNFDRLVVVKSRVDPDNFF 279
FADOX12 NPRTAYLNSRDLDLGQQY.CEDYQDISSHLNARVW.VEIFKILKD..... 155
FADOX13 SPRAAYVNYRDLDLGKN...NDLPNVSYLKATQWGTKYFKGNFKRLTMVMKEVDPQNYF 55
FADOX14 .....
FADOX15 .....
FADOX16 .....

```

```

      . . . 550 . . . 560
BBE      NHPOSIPPMMKFEETIYMLKEL 535
FADOX1   RNEQSIPSDGLF..... 524
FADOX3   KHEQSIPSIASYRSTY..... 536
FADOX4   NHPOSIPPMMKFEENYMLKEL 535
FADOX5   KNKQSIPPVSTWKGQ..... 537
FADOX7   RNEQSIPAVSY..... 535
FADOX8   RNEQSIPSIAYVLKI..... 532
FADOX9   RHEQSIPSIAY..... 407
FADOX10  RHEQSIPSIAY..... 326
FADOX11  RNEQSIPPSVAH..... 290
FADOX12  .....
FADOX13  NDEQSIPPFSAISISVSDM... 73
FADOX14  .....
FADOX15  .....
FADOX16  .....

```

**FIGURE S1. Alignment of deduced amino acid sequences of opium poppy FAD-dependent oxidases (FADOXs) with opium poppy berberine bridge enzyme (BBE1).** Sequences were aligned using ClustalX. Shaded boxes indicate residues that are identical in at least 40% of the aligned proteins. Dots represent gaps introduced into sequences to maximize the alignment.

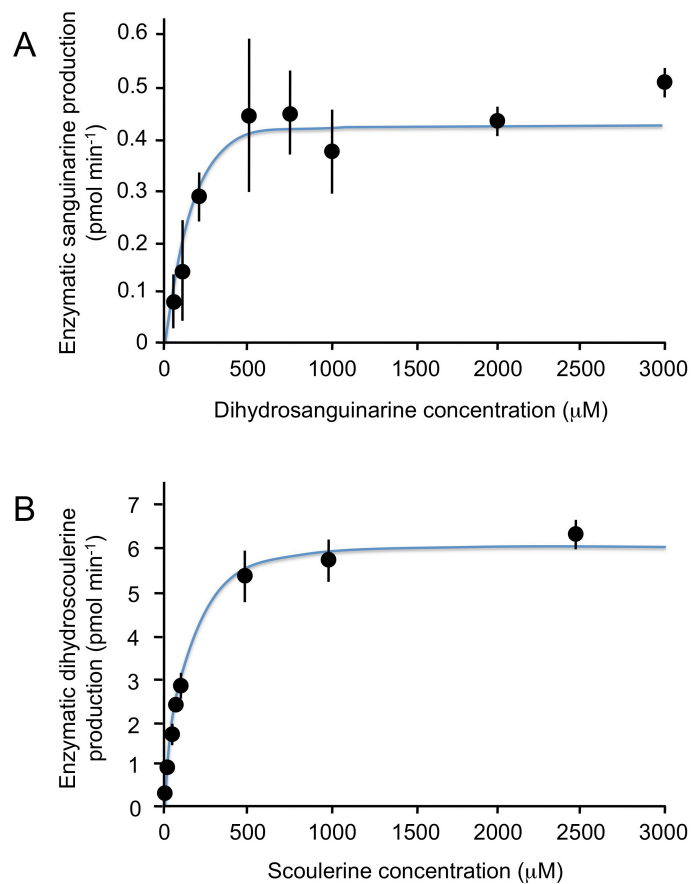

**FIGURE S2. Steady-state enzyme kinetics of recombinant DBOX with varying concentrations of (*S*)-scoulerine (*A*) and dihydrosanguinarine (*B*) substrates.** Enzyme assays were conducted as described in Experimental Procedures. Incubation time and protein quantity were adjusted prior to final analyses to ensure linear-range conditions. Points represent mean  $\pm$  standard deviation of three (for scoulerine) and five (for dihydrosanguinarine) independent experiments. Curve-fitting and  $K_m$  determinations were performed using GraphPad Prism 5.



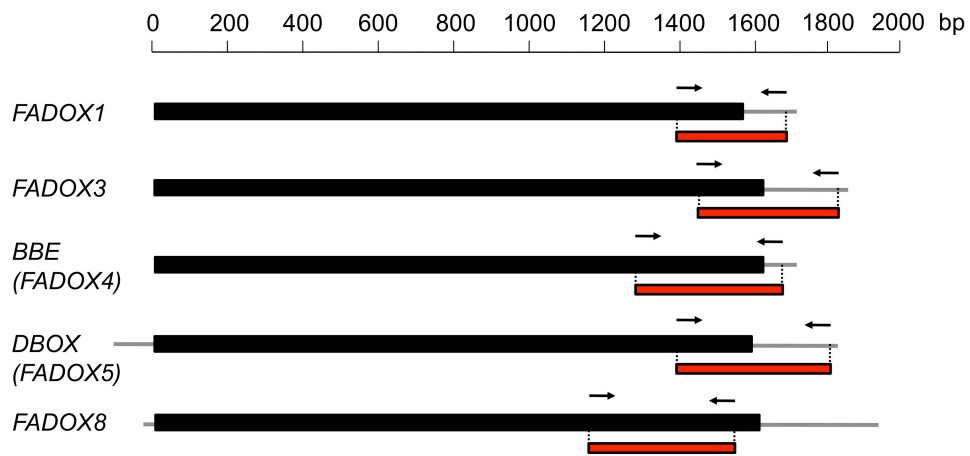

**FIGURE S3. Regions of various FADOX cDNAs used to construct virus-induced gene silencing (VIGS) vectors in pTRV2.** Coding regions of each cDNA are shown as thick black line elements, whereas non-coding 5'- and 3'-untranslated regions (UTRs) are shown as thin lines. Red segments represent unique regions in each cDNA used to construct gene-specific VIGS vectors. Sequence lengths are shown in base pairs (bp) with respect to the start codon in each cDNA. For pTRV2-BBE, a nearly identical region in *BBE1* and *BBE2* was selected.

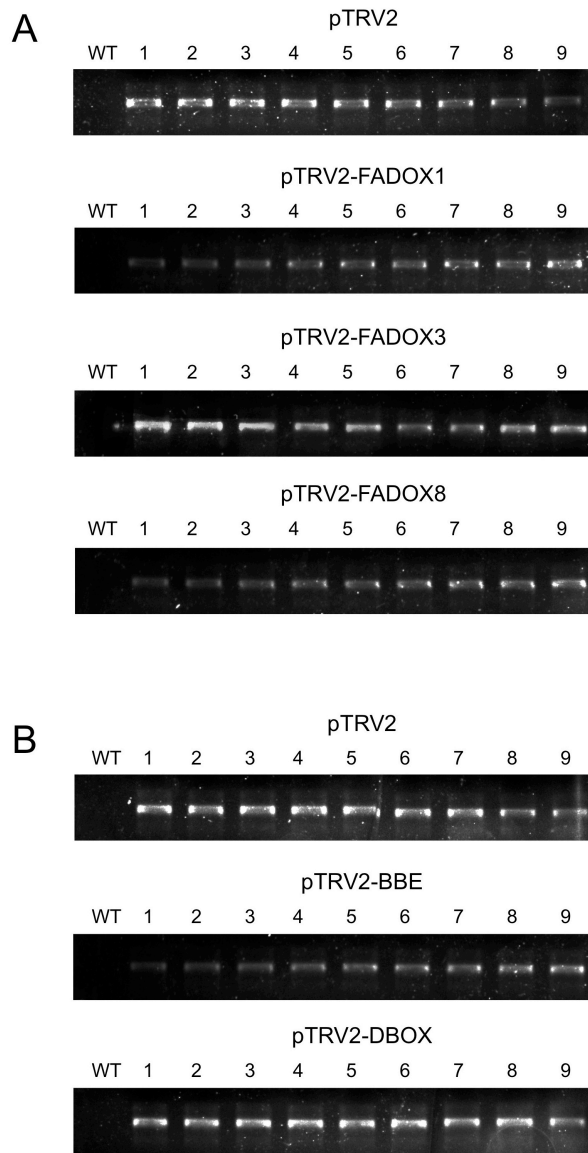

**FIGURE S4. Detection of tobacco rattle virus in individual opium poppy plants infiltrated with various pTRV2 vectors, and used for gene expression and alkaloid profile analyses.** RT-PCR was performed using primers listed in supplemental Table S1. The 613-base pair amplicon corresponding to tobacco rattle virus-coat protein transcripts was detected on agarose gels stained with ethidium bromide.



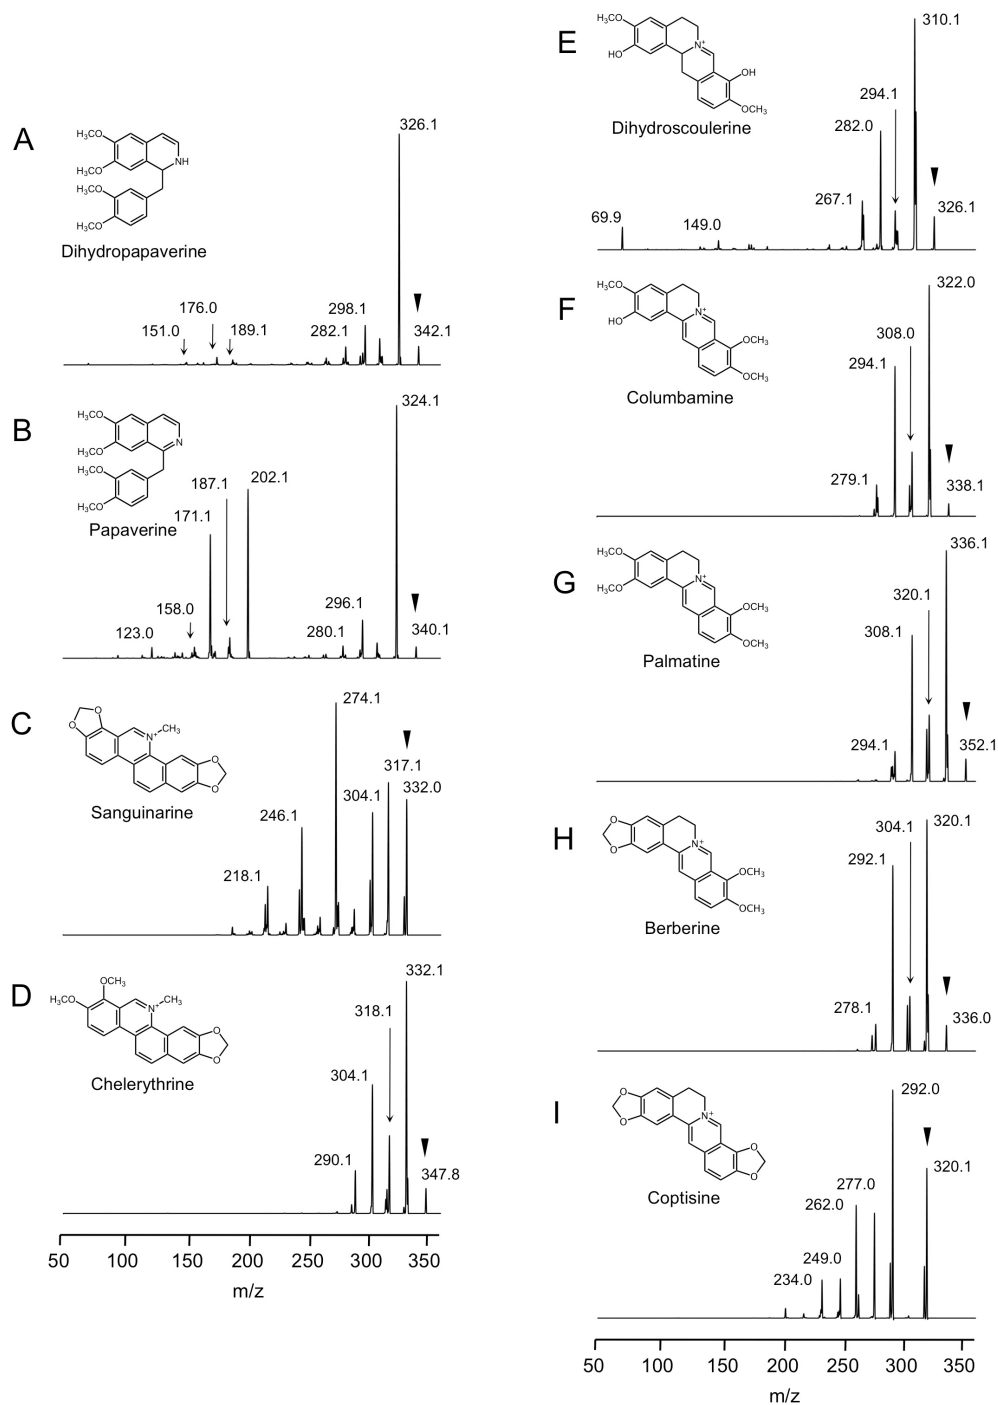

**FIGURE S5. Collision-induced dissociation mass spectra for reaction products of DBOX (FADOX5) enzyme assays.** Following liquid chromatography, molecular parent ions (arrowheads) were generated and focused using electrospray ionization (ESI) and subjected to mass spectrometry. To identify or characterize compounds, daughter ions were generated using argon gas collision at either -30 eV (benzophenanthridines) or -35 eV (1-benzylisoquinolines and protoberberines). Parent ion structures are shown. In panel A, the structure of only one isoform (1,2-dihydropapaverine) is shown, although CID analysis does not preclude the occurrence of 3,4-dihydropapaverine.

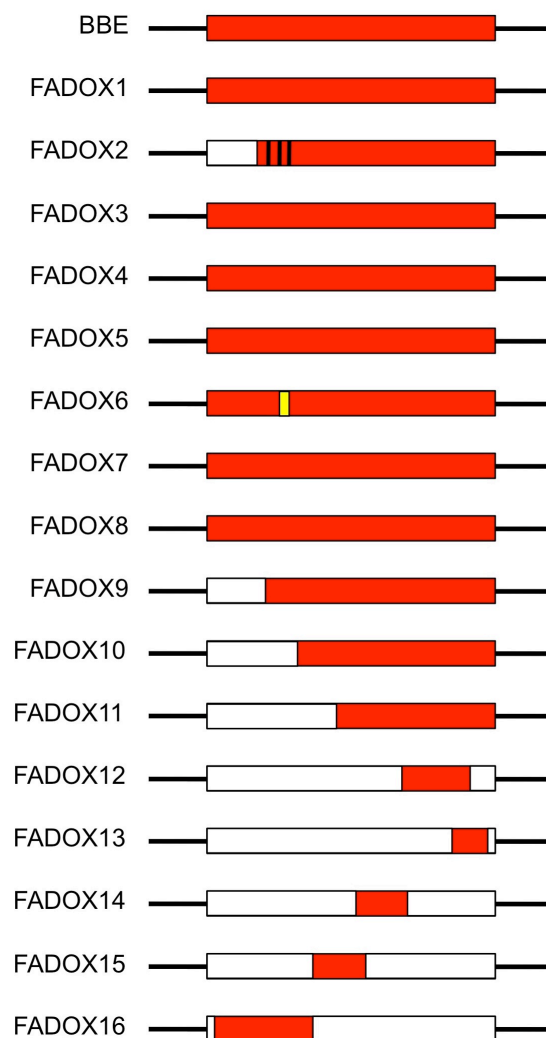

**FIGURE S6. Schematic representation of sequence coverage for sixteen independently assembled contigs representing opium poppy FAD-dependent oxidases (FADOXs) with homology to berberine bridge enzyme (BBE).** Red designates open reading frame (ORF) regions for which DNA sequence was available, whereas the remaining open-box regions indicate putatively missing ORF sequence. Black lines flanking each ORF represent untranslated regions (UTRs). FADOX2 contained three stop codons (black stripes) and FADOX6 showed a sequence gap (yellow stripe) compared with BBE.

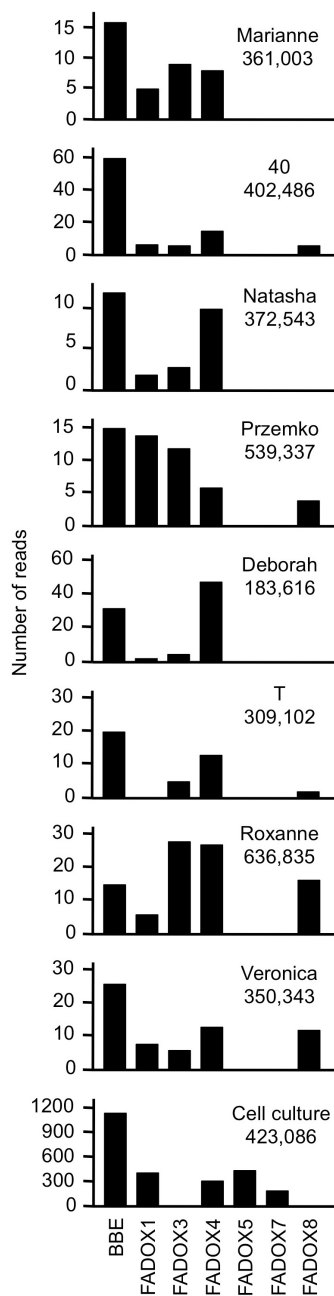

**FIGURE S7. Expression levels of opium poppy berberine bridge enzyme (BBE1) and FAD-dependent oxidoreductases (FADOXs) as indicated by the number of reads in nine different Roche 454-based sequence libraries.** BBE1 and FADOX read abundances are shown for stem databases representing eight different opium poppy chemotypes and a single sanguinarine-accumulating opium poppy cell culture database. The total read count for each library is indicated under the library name in each panel.

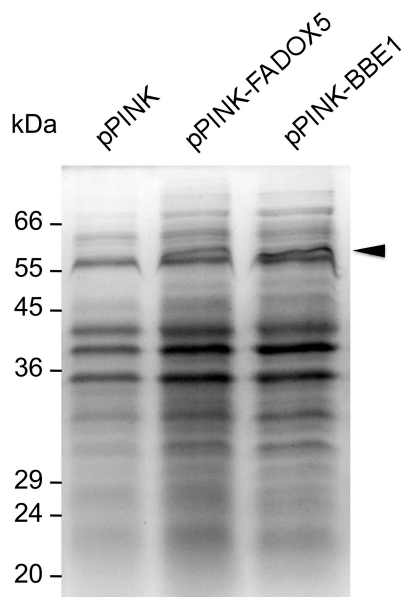

**FIGURE S8. SDS-PAGE of recombinant FADOX5 and BBE proteins produced in *Pichia pastoris*.** Each lane represents 4% (v/v) of total protein obtained from 100-mL of *P. pastoris* culture medium following 100 h of induction. Yeast harboring empty pPINK $\alpha$ -HC vector were included as a negative control. Coomassie Brilliant Blue staining was used to visualize proteins.

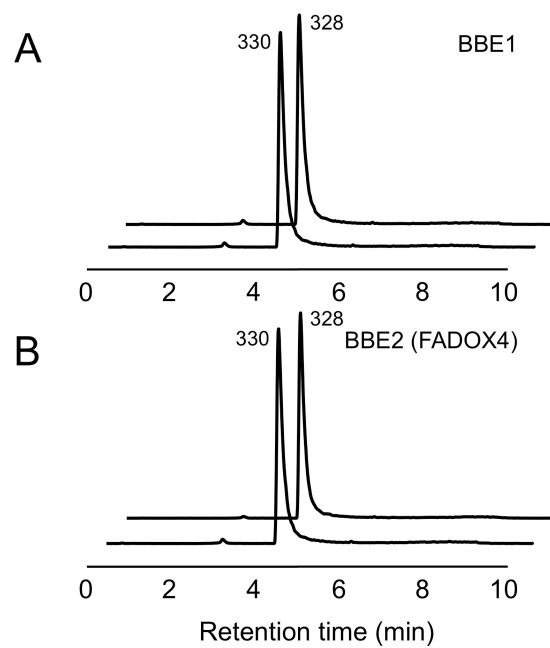

FIGURE S9. **Extracted ion chromatograms (EICs) showing the conversion of (S)-reticuline to (S)-scoulerine by BBE1 and BBE2 (FADOX4).** In each panel, the lower EIC corresponds to an assay conducted with the empty pPINK $\alpha$ -HC vector control, and the upper EIC shows an assay performed with recombinant enzyme. Parent ion mass-to-charge ( $m/z$ ) values are indicated next to substrate and product peaks. The latter were subjected to collision-induced dissociation analysis for identification.

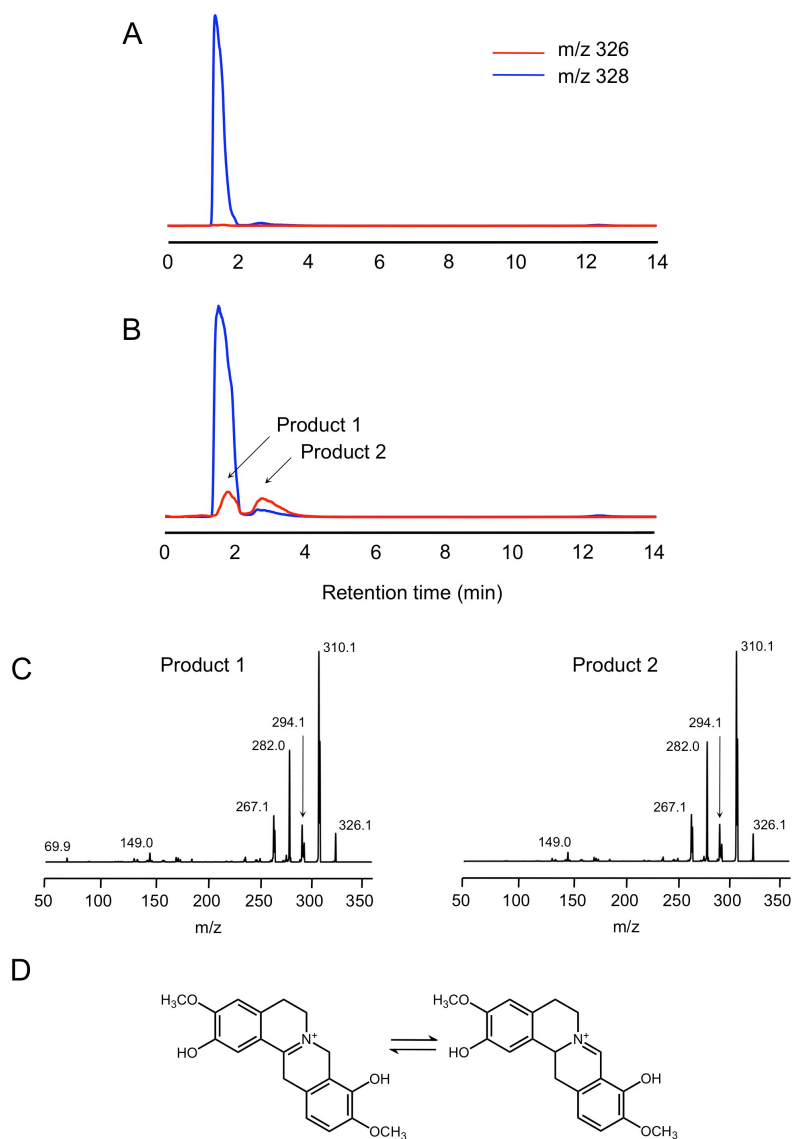

**FIGURE S10. DBOX catalyzes the formation of two reaction products with the same molecular ion mass from (*S*)-scoulerine substrate.** Extracted ion chromatograms corresponding to the (*S*)-scoulerine substrate (blue, *m/z* 328) and product (red, *m/z* 326) in standard enzyme assays containing culture medium proteins from *Pichia pastoris* (*A*) harboring empty pPink $\alpha$ -HC vector and (*B*) producing opium poppy DBOX. Despite identical *m/z* values, DBOX reaction products eluted separately after liquid chromatography at 1.8 min (Product 1) and 2.8 min (Product 2), respectively, with Product 1 co-eluting with (*S*)-scoulerine. *C*, Collision-induced dissociation spectra obtained for each product using collision energy of -35 eV. *D*, Proposed isomers of dihydroscoulerine corresponding to Product 1 and Product 2.

|                       |                  | Relative activity (%) and reaction product                                          |      |    |
|-----------------------|------------------|-------------------------------------------------------------------------------------|------|----|
|                       |                  | BBE1                                                                                | DBOX |    |
| Aporphine             | (S)-Glaucine     | 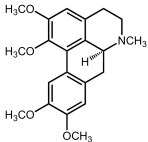   | nd   | nd |
|                       | (S)-Isocorydine  |    | nd   | nd |
|                       | (S)-Bulbocapnine |    | nd   | nd |
| Morphinan             | Thebaine         |    | nd   | nd |
|                       | Oripavine        |    | nd   | nd |
|                       | Codeine          |   | nd   | nd |
|                       | Morphine         |  | nd   | nd |
|                       | Narcotine        |  | nd   | nd |
| Phthalideisoquinoline | Noscapine        |  | nd   | nd |
| Pavine                | (+/-)-Pavine     |  | nd   | nd |
| Bisbenzylisoquinoline | Berberamine      |  | nd   | nd |

FIGURE S11. Additional benzylisoquinoline alkaloids tested as substrates for BBE1 and DBOX (FADOX5). Abbreviation: nd, not detected.

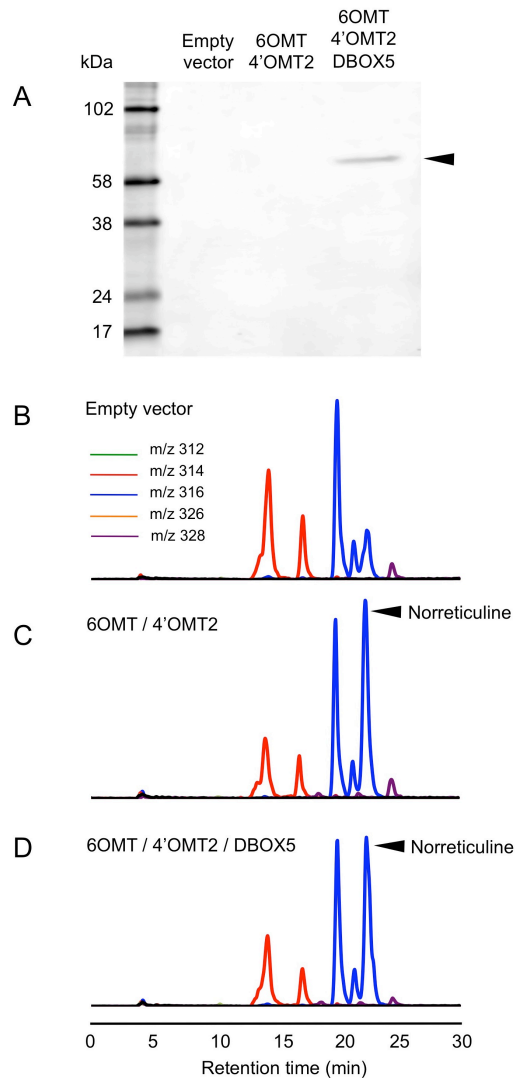

FIGURE S12. Strains of *Saccharomyces cerevisiae* co-expressing **6OMT** and **4'OMT2**, or **6OMT**, **4'OMT2**, and **DBOX**, and batch-fed (*R,S*)-norlaudanoline accumulate **endogenous (*S*)-norreticuline**. The yeast strain expressing *DBOX* does not turnover norreticuline (*m/z* 316) to expected oxidation products (*m/z* 314, 312) or reaction byproducts (*m/z* 328, 326). *A*, Immunoblot analysis for HA-tagged, recombinant *DBOX* produced in *S. cerevisiae*. Yeast cell pellets were re-suspended in 200  $\mu$ L of CelLytic Y (Sigma) containing the mini-complete protease inhibitor cocktail (Roche) and 10 mM dithiothreitol. Glass beads ( $\sim$ 50  $\mu$ L) were added and cells were incubated with shaking for 1 h at room temperature, followed by vortexing. Protein extracts (50  $\mu$ g) were separated by SDS-PAGE and subsequently transferred to a nitrocellulose membrane for HA epitope detection. *B-D*, Extracted ion chromatograms (EICs) of culture medium corresponding to endogenous norreticuline (*m/z* 316), potential oxidation products (*m/z* 314, 312) and byproducts (*m/z* 328, 326) observed in enzyme assays using *Pichia pastoris* culture medium proteins. Culture medium was diluted five-fold in 50% (v/v)

Continued on next page



Continued from previous page

methanol containing 0.2% formic acid. Metabolites were separated on an Agilent Eclipse C18 (2.1 mm × 150 mm, 3.5 μm) column using a gradient of 0.2% (v/v) formic acid (solvent A) and acetonitrile containing 0.2% formic acid (solvent B). The solvent gradient was 0-3 min at 5% B, 3-55 min 5–45% B, 55–60 min 40–90% B, 60-62 min 90-5% B, followed by a 10 min equilibration at 5% B. Metabolites were detected using a Finnigan LTQ ion trap mass spectrometer (Thermo Scientific). Collision-induced dissociation analysis was used to identify norreticuline eluting at 22.5 minutes. Similar results were obtained using cell lysates.

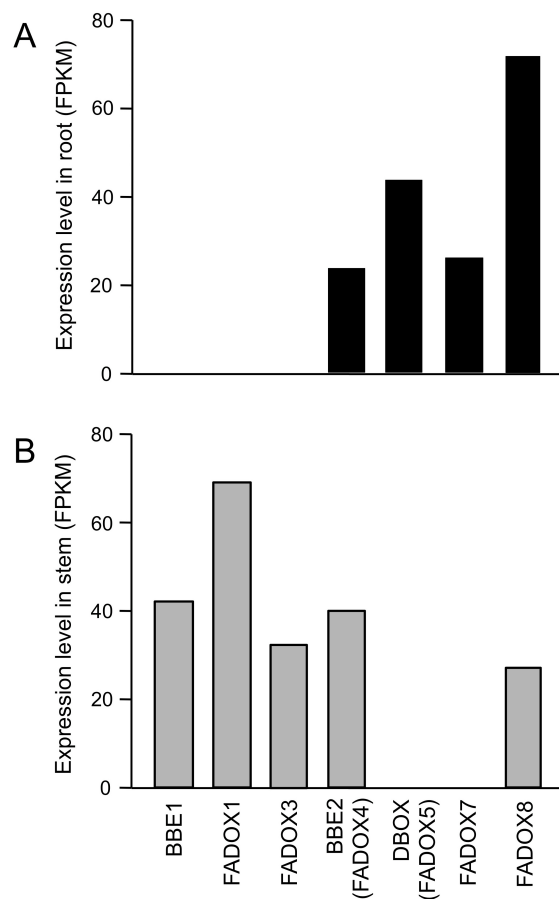

FIGURE S13. **BBE and DBOX (FADOX5) gene expression levels in stem (upper panel) and root (lower panel) of opium poppy determined by RNA-seq analysis.** The opium poppy chemotype used was Bea's Choice. FPKM denotes fragments per kilobase of exon model per million mapped reads.



Continued from previous page

steps. Abbreviations: 4'OMT, 3'-hydroxy-*N*-methylcoclaurine 4'-*O*-methyltransferase; 6OMT, norcoclaurine 6-*O*-methyltransferase; BBE, berberine bridge enzyme; CAS, canadine synthase; CheSyn, cheilanthifoline synthase; CNMT, coclaurine *N*-methyltransferase; CODM, codeine *O*-demethylase; COR, codeinone reductase; DBOX, dihydrobenzophenanthridine oxidase; NCS, norcoclaurine synthase; NMCH, *N*-methylcoclaurine 3'-hydroxylase; NMSH, *N*-methylstylophine 14-hydroxylase; P6H, protopine 6-hydroxylase; SalAT, salutaridinol 7-*O*-acetyltransferase; SalR, salutaridine:NADPH 7-oxidoreductase; SalSyn, salutaridine synthase; SOMT, scoulerine 9-*O* methyltransferase; STOX, (*S*)-tetrahydroxyprotoberberine oxidase; StySyn, stylophine synthase; T6ODM, thebaine 6-*O*-demethylase; TNMT, tetrahydroprotoberberine *cis-N*-methyltransferase; TPOX, tetrahydropapaverine oxidase.

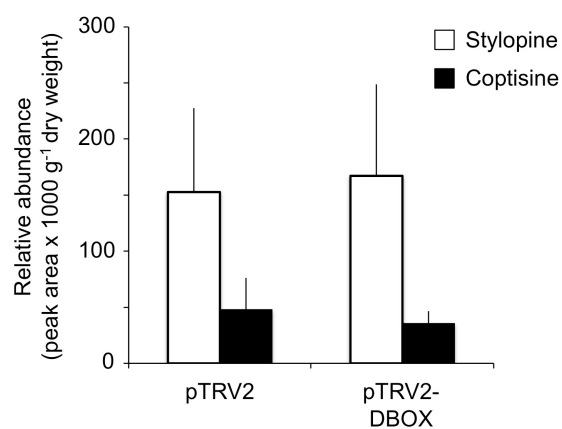

**FIGURE S15. Effect of virus-induced gene silencing (VIGS) on stylophine and coptisine levels in opium poppy roots.** Multiple reaction monitoring (MRM) was used at  $m/z$  176, 149 (stylophine) and  $m/z$  292, 318 (coptisine) whereby the first ion represents the quantifier and the second ion the qualifier, respectively. Paired t-test analysis indicated no significant difference in alkaloid levels between empty pTRV2 vector control and *DBOX*-silenced (pTRV2-*DBOX*) plants at  $P < 0.05$ .

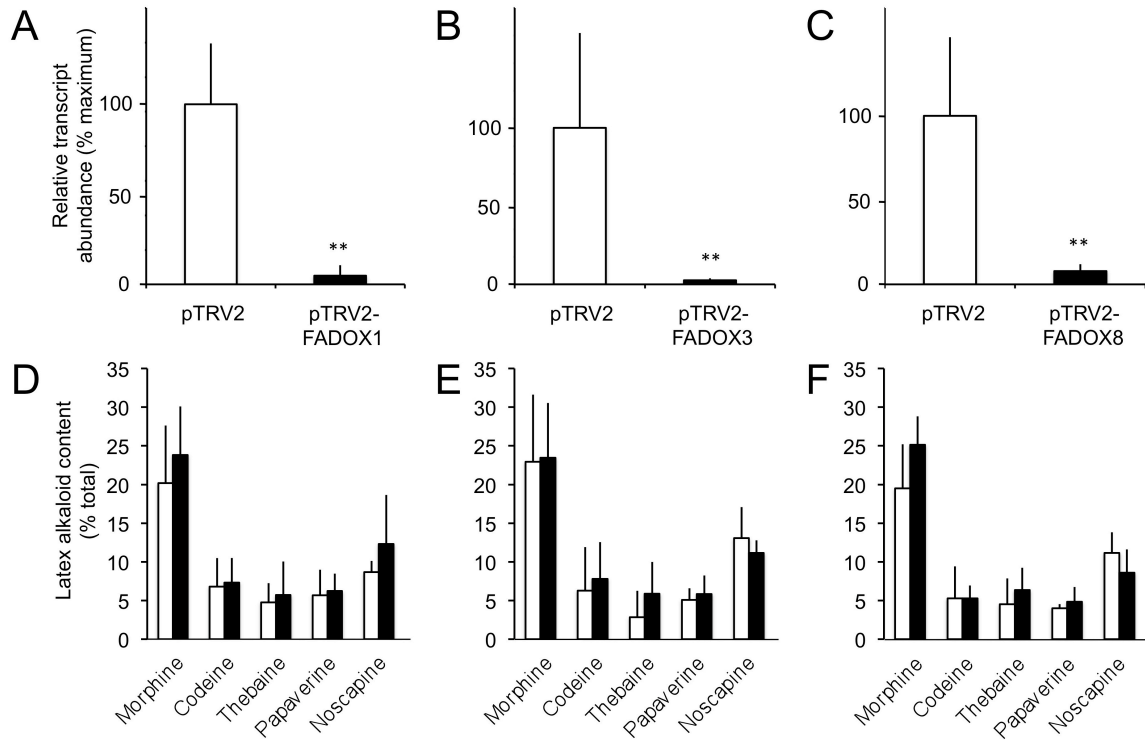

**FIGURE S16. Effect of suppressing FADOX1, FADOX3, and FADOX8 transcript levels by virus-induced gene silencing on latex alkaloid profiles.** *A-C*, Relative *FADOX* transcript abundance in stems of opium poppy chemotype Bea's Choice infiltrated with *Agrobacterium tumefaciens* harboring various pTRV2 constructs or the empty pTRV2 vector. *D-F*, Relative alkaloid levels in *FADOX*-silenced plants. Mean  $\pm$  standard deviation was calculated for nine plants per construct. Paired t-test analysis indicated no significant differences in the major alkaloid content of empty vector controls (pTRV2) and *FADOX*-silenced plants at  $P < 0.05$ .
